# Supplementary material
Source: PubMed Central journal article supplement (PMC3107332)
Supplement: 1102140108_pnas.1102140108_SI.pdf [file 1102140108_pnas.1102140108_SI.pdf]

# Supporting Information

Lamonica et al. 10.1073/pnas.1102140108

## SI Materials and Methods.

**Peptides.** GATA1 peptides were produced by the Rockefeller University peptide synthesis facility or Peptide 2.0. An N-terminal cysteine was added to allow coupling to Sulfo-link resin (Pierce).

**Peptide Affinity Pulldown Assays.** Peptides were coupled to Sulfo-link resin according to manufacturer's instructions. Approximately 7.5 mg of nuclear extracts from mouse erythroleukemia (MEL) cells (1) were diluted to 150 mM NaCl and incubated with 200 ng immobilized peptide overnight at 4 °C. Beads were washed five times with buffer containing 450 mM NaCl, 50 mM Tris pH 7.5, and 0.5% Igepal and eluted by boiling in sodium dodecyl sulfate (SDS) sample buffer. Mass spectrometry was performed by the Proteomics Core Facility of the Genomics Institute at the University of Pennsylvania. For all small-scale binding studies, 25–50 ng immobilized peptide were incubated with extracts prepared from 10 million cells, or [<sup>35</sup>S] methionine labeled protein generated from the rabbit reticulocyte system (TNT, Promega). All affinity assays were performed in the presence of 10 mM sodium butyrate, 1 mM PMSF, and protease inhibitor cocktail (Sigma).

**Transfections and Coimmunoprecipitation.** Transient transfections of 293T cells were performed using polyethylenimine (PEI) at a ratio of PEI to DNA of 3:1. Cells were harvested 48 h after transfection and nuclear extracts were prepared as described above. Extracts from 8 to 10 million cells were added to 5 µg antibody prebound to 20 µL protein G agarose. To reduce nonspecific binding, antibody-bound beads were incubated with extract prepared from untransfected cells prior to immunoprecipitation. After extensive washing, beads were boiled in SDS sample buffer, and bound proteins were analyzed by Western blotting. For coimmunoprecipitations of GATA1-ER and endogenous Brd3, G1E-ER4 cells were treated with the histone deacetylase inhibitors sodium butyrate and trichostatin A for 2 h prior to harvesting to preserve protein acetylation.

**GST Pulldown Assays.** GST fusion proteins were prepared as described. Equal amounts of GST, GST-BD1, GST-BD1 Y72F, and GST-BD2 were immobilized on glutathione sepharose beads and incubated with nuclear extracts from transiently transfected 293T cells as described above. Where indicated, chromatin was extracted by hypotonic lysis of cells in Buffer A (10 mM Hepes, 1.5 mM MgCl<sub>2</sub>, 10 mM KCl, 10 mM sodium butyrate/protease inhibitor cocktail/50 µg/mL PMSF, pH 7.9), followed by centrifugation. The resulting nuclei were lysed in buffer containing 50 mM Tris, 10 mM EDTA, 1% SDS, 10 mM sodium butyrate, protease inhibitor cocktail, 50 µg/ml PMSF, pH 8.1) and the lysate was sonicated. Soluble chromatin was diluted with immunoprecipitation buffer (20 mM Tris, 150 mM NaCl, 2 mM EDTA, 0.01% SDS, 1% Triton X-100, 10 mM sodium butyrate, protease inhibitors, 50 µg/mL PMSF, pH 8.1) followed by overnight incubation at 4 °C with rotation.

**In Vitro Acetylation of GATA1.** Acetylation of the zinc finger region of GATA1 was performed as previously described (2). Mass spectrometry to identify GATA1 acetylation sites was performed at the Taplin facility at Harvard University.

**Cell Culture.** G1E cells were maintained as described (3). Where indicated, cells were treated with 100 nM estradiol (E2) for 21–24 h. MEL and 293T cells were cultured in Dulbecco modified

Eagle medium with 10% fetal bovine serum, 2% penicillin-streptomycin, 1% glutamine, and 1% Na pyruvate. MEL differentiation was performed by adding 1.5% DMSO to the growth medium for 72 h. The murine megakaryocyte line L8057 was maintained in F-12 nutrient mixture (Invitrogen) with 100 U/mL penicillin, 100 U/mL streptomycin, 2 mM L-glutamine, and 10% fetal bovine serum.

**Plasmids.** The GATA1 expression plasmids pXM-GATA1 and the mutant derivatives pXM-GATA1 NC(A), pXM-GATA1 N(A), and pXM-GATA1 C(A) were described previously (2, 4). The GST-GATA1 zinc finger construct has been described (5, 6). The CREB binding protein (CBP) expression plasmid pCMV5-CBP and the GATA2 expression plasmid pXM-GATA2 have been described previously (7, 8). Lysine to arginine substitutions were introduced into the N-terminal (RPRRRMI) or C-terminal (SGRGRRRRGS) acetylation motifs of GATA1 and cloned into the mammalian expression vector pCDNA3.

Murine HA-Brd3 isoform 2 and HA-Brd4 isoform 2 were amplified from a MEL cell cDNA library and inserted into pCDNA3 and the retroviral vector MigR1. Overlapping PCR was used to generate ΔBD1 (Δ33-144), ΔBD2 (Δ306-418), and ΔBD1+2 (Δ33-144; Δ306-418), followed by insertion into pCDNA3 and MigR1. Brd3 Y72F, Y347, and Y72F/Y347F were generated by the QuikChange site-directed mutagenesis kit per the manufacturer's instructions (Stratagene) and inserted into MigR1. BD1 (aa24-aa146) and BD2 (aa306-418) of Brd3 were isolated by PCR and inserted into pGEX 6P-1. A 5' NLS derived from the SV40 Large T antigen and the 3' UTR from *Hbb-b1* were added for nuclear localization and increased mRNA stability, respectively, prior to insertion of BD1 and BD2 into MigR1.

**Retroviral Infections.** Retroviral infections were done as previously described (9).

**Antibodies.** Rabbit anti-Brd3 sera were generated using two independent peptide antigens corresponding amino acids (aa) 484–501 and aa 656–673 of mouse Brd3. Rabbit anti-Brd4 serum was raised against a peptide spanning aa 280–297 (Cocalico Biologicals, Inc). Specificity of the sera was tested by Western blot, immunoprecipitation, and ChIP analyses (Fig. 3 and Fig. S2). Additional antibodies used in this study were anti-GATA1 (sc-265; Santa Cruz), anti-GATA2 (sc-9008; Santa Cruz), anti-FOG1 (sc-9361; Santa Cruz), antiacetyl histone H3 (17-615; Upstate), antiacetyl histone H4 (06-866; Upstate), anti-acetyl-H4K5 (07-327; Upstate), anti-acetyl-H4K12 (07-595; Upstate), anti-HA (12CA5), and anti-β-actin conjugated to horseradish peroxidase (A3854; Sigma).

**ChIP Followed by Massively Parallel Sequencing Analysis.** Anti-Brd3 ChIP material from G1E or induced G1E-ER4 cells was sequenced on a HeliScope Single Molecule Sequencer (Helicos). Alignment to the mouse genome (mm9 RefSeq assembly) yielded 21.4e6 and 11.3e6 aligned reads in G1E and G1E-ER4 cells, respectively. Aligned reads were placed into 4.1e6 genomic bins of 500 bp each and normalized to adjust for differences in sequencing depth. Most genomic analyses described below were carried out using Galaxy (10); <http://galaxy.psu.edu>, and analysis histories are available on request. To generate Brd3 binding data for Fig. 5, the number of normalized Brd3 read counts within the genomic bin at the center of GATA1 peak intervals was queried for GATA1 binding sites derived from a published dataset that

was generated in G1E-ER4 cells (11). To categorize GATA1 sites into likely activating or repressive binding sites, each site was first assigned to the closest RefSeq gene's transcription start site. A published expression microarray dataset (11) (GEO accession number GSE18042) was used to define the subsets of GATA1 peaks associated with the top 5% induced (activating) and the top 5% repressed genes after activation of GATA1 in G1E-ER4 cells (repressive sites). Descriptive and inferential statistical analysis was performed using R (<http://www.r-project.org>). The built-in boxplot function was used to summarize each dataset to indicating the median, the upper and lower quartiles, and the range excluding outliers. The nonparametric Mann-Whitney *U* test was employed to test the statistical significance of the differences between pairs of normalized Brd3 read count distributions. Because the number of data points varied significantly among the different datasets, an equally sized random sample ( $n = 400$ ) from each dataset was used for significance testing.

For Fig. S7, the genes ranking within the top 1%, 1% to 5%, and 5% to 25% expression level and the genomic coordinates of their transcribed regions (RefSeq) were determined. A combination of custom-written Ruby scripts and the MySQL database system was employed to determine mean normalized Brd3 read counts at 3,000 equally spaced positions one full gene length upstream of the transcription start site to one full gene length downstream of the transcription end site. For comparison, the genome-wide average Brd3 signal was plotted as well.

#### ChIP Realtime PCR Primers (5' to 3')

All primers correspond to the murine genomic sequence.

#### $\beta$ globin locus

##### HS4

Forward GAGATCCTGCCAAGACTCTGATAATACTA  
Reverse CCTGGCTTCTGGTCCAGTAG

##### Intervening Region (IVR) 4/3B

Forward CACGAGTTTCCTTTCATGCTTATG  
Reverse CCAGCCCTTCTGGAACCTTCTC

##### HS3

Forward CTAGGGACTGAGAGAGGCTGCTT  
Reverse ATGGGACCTCTGATAGACACATCTT

##### HS2

Forward GGGTGTGTGGCCAGATGTTT  
Reverse CACCTTCCCTGTGGACTTCCT

##### HS1

Forward CAGATCCTCAAACACTCTCCATAA  
Reverse TGCCTTCTTTGTCCCATCATT

##### Ey

Forward ATGACCTGGCTCCACCCAT  
Reverse TCTTTGAAGCCATTGGTCAGC

##### IVR1

Forward TGTGCTAGCCTCAAGCTCACA  
Reverse TCCCAGCACTCAGAAGAAGGA

##### BH1

Forward AGGTCCAGGGTGAAGAATAAAAAGG  
Reverse ATCTCAAGTGTGTGCAAAAAGCCAGA

##### IVR2

Forward GTATGCTCAATTCAAATGTACCTTATTTTAA  
Reverse TTACCTCTTTATTTCACTTTTACACATAGCTAA

##### *Hbb-b1* promoter

Forward CAGGGAGAAAATATGCT  
Reverse GTGAGCAGATTGGCCCTTACC

##### *Hbb-b1* intron 2

Forward CTTCTCTCTCTCCTCTCTCTTTCTCTAATC  
Reverse AATGAACTGAGGGAAAGGAAAGG

##### IVR3

Forward ATAGGAAAGAAAATGCACACATAGATTC  
Reverse CCCACGCTCATTTATACTTTTTCAG

##### *Hbb-b2* promoter

Forward GAGCCAGCATTGGGTATATAAAGC  
Reverse ACAGACTCAGAAGCAAACGTAAGAAG

##### IVR4

Forward TGGCCATTTTACTATGTAAATTTTGG  
Reverse TAGACTTGTTCATGGTTATGGATTGG

#### Kit locus

##### -232 kb

Forward TGCCTTGGCAAACCTTCCTG  
Reverse AGGGATGTGTCTCACCGTGTGTC

##### -114 kb

Forward GCACACAGGACCTGACTCCA  
Reverse GTTCTGAGATGCGGTTGCTG

##### -86 kb

Forward CGGAGCACCGAAGAGTCTTG  
Reverse GCAGCTCCGGGTAAAATAGAAAA

##### -51 kb

Forward CCACGGATAATGCCCTCTGT  
Reverse GGGTCCCCGATGATACACTCT

##### promoter

Forward CACCTCCACCATAAGCCGAAT  
Reverse CTCCTAGACAATAAAGGACAACCA

##### +5 kb

Forward GGCTGGAAACCACTGCCTTA  
Reverse AGCCTTGCCTGTGCTTAAAGC

##### +17 kb

Forward GGCTGCCAAGGCTTGTC  
Reverse AAATCTGCCTGGCTTTTACACCTA

##### +58 kb

Forward GGAGGAGTTAGGGAATATGTCGATAG  
Reverse GCAGTTCTCCAGGTTGAGTCAGA

##### +65 kb

Forward GACGCAACTTCTTATGATCACAA  
Reverse CCTGCCTCACACTGACCAAA

##### +73 kb

Forward AACTGAAGCGAGTACAGCATTCC  
Reverse TGCTTTTGTGTACTGTAACTG

##### +76 kb

Forward AAGAGGCAAGGTCAGAGTAAGCTT  
Reverse GCGCACAGTTAGTGCTTATGTCA

##### *Hba-a1* HS-31

Forward TTCTGACCTCACCTCAGCTAAGC

Reverse TGTGTGGGCAGAGGACACA

*Hba-a1* HS-12

Forward ACCCTGACTCAAACAACAAAGTAA  
Reverse GGTTTCTGAGTTTCCTTATCTGCAA

*Klf1* promoter

Forward TCTGCTCAAGGAGGAACAGAGCTA  
Reverse GGCTCCCTTTCAGGCATTATCAGA

*Eraf* promoter

Forward TGCCTGCGTCTCGCTTAGT  
Reverse GCTGAGCCCGCCTCATC

*Eraf* transcribed region (TR)

Forward TTAAAGGGTCTGGGCATCATG  
Reverse CAACATCTTGGGAGAACGGTC

*Slc4a1* promoter

Forward CTGAGCAGTCAAGCCTTAGTTCAC  
Reverse CCTGTCCAGTCCCTAAGGTCTTT

*Zpfm1* intron 1

Forward TGCAAGTCCCATCCTGATAAGA  
Reverse GCACGCCAGATAAGATCACAAAT

*Zpfm1* upstream

Forward GGCAGATGTTCACTGTGGCA  
Reverse GGGAGGAGCCAGAGGTCA G

*Lyl1* promoter

Forward TCAGCATTGCTTCTTATCAGCC  
Reverse CGCAGAGGCCAGAGGATG

*Gapdh* promoter

Forward TCCCCTCCCCCTATCAGTTC  
Reverse GACCCGCTCATTTTTGAAA

*Gapdh* +2 kb

Forward GGGCAAGCAATCACCTCTTG  
Reverse GGCCTGGCAGGGCTTTTA

*CD4* 5' transcribed region

Forward CCAGAACATTCCGGCACATT  
Reverse GGTAAGAGGGACGTGTTCAACTTT

*GPIb* promoter

Forward TGGTGGCTAGTAGCTGCAAAGTC  
Reverse TTATCAGCTCTCTGCACAGCATTC

*PF4* promoter

Forward GCTGCTGGCCTGCACTTAAG  
Reverse GCCACTGGACCCAAAGATAAAG

*cMpl* promoter

Forward CTGCCAACAGAAGGCTCATG  
Reverse CTGTCAGATACAGCCCCACGT

*Iib* promoter

Forward GCCATGAGCTCCAGTCTGATAA  
Reverse AGCTCTTTCCTTTCCTGAA

*Iib* -3 kb

Forward AAATAGATGTCAAGTTGGCATAAACCT  
Reverse TGCCAGCGTTCAAGTACAAAA

RT-PCR Primers

*Pabpc1*

Forward AACACAGACAATGGGTCCAC  
Reverse GGACTCCCGCAGCATATTTA

*Gapdh*

Forward GATGCCCCCATGTTTGTGAT  
Reverse GGTCATGAGCCCTTCCACAAT

*Hbb-b1*

Forward AACGATGGCCTGAATCACTTG  
Reverse AGCCTGAAGTTCTCAGGATCC

*Eraf*

Forward GCCATGACAGAATTCCAGCAA  
Reverse TTTGGACTTCAGAAAGGTCCTGTAT

*Slc4a1*

Forward TGGAGGCCTGATCCGTGATA  
Reverse AGCGCATCGGTGATGTCA

*Kit*

Forward AGCAGATCTCGGACAGCACC  
Reverse TGCAGTTTGCCAAGTTGGAG

*Brd3*

Forward GGACTIONAACCCAGACGAGATT  
Reverse TGTTGACAAATGGTTTCCTCTGC

1. Blobel GA, Nakajima T, Eckner R, Montminy M, Orkin SH (1998) CREB-binding protein cooperates with transcription factor GATA-1 and is required for erythroid differentiation. *Proc Natl Acad Sci USA* 95:2061–2066.
2. Hung HL, Lau J, Kim AY, Weiss MJ, Blobel GA (1999) CREB-binding protein acetylates hematopoietic transcription factor GATA-1 at functionally important sites. *Mol Cell Biol* 19:3496–3505.
3. Weiss MJ, Yu C, Orkin SH (1997) Erythroid-cell-specific properties of transcription factor GATA-1 revealed by phenotypic rescue of a gene-targeted cell line. *Mol Cell Biol* 17:1642–1651.
4. Martin DI, Orkin SH (1990) Transcriptional activation and DNA binding by the erythroid factor GF-1/NF-E1/Eryf 1. *Genes Dev* 4:1886–1898.
5. Merika M, Orkin SH (1995) Functional synergy and physical interactions of the erythroid transcription factor GATA-1 with the Kruppel family proteins Sp1 and EKLF. *Mol Cell Biol* 15:2437–2447.
6. Crossley M, Merika M, Orkin SH (1995) Self-association of the erythroid transcription factor GATA-1 mediated by its zinc finger domains. *Mol Cell Biol* 15:2448–2456.
7. Kamei Y, et al. (1996) A CBP integrator complex mediates transcriptional activation and AP-1 inhibition by nuclear receptors. *Cell* 85:403–414.
8. Dorfman DM, Wilson DB, Bruns GA, Orkin SH (1992) Human transcription factor GATA-2. Evidence for regulation of preproendothelin-1 gene expression in endothelial cells. *J Biol Chem* 267:1279–1285.
9. Tripic T, et al. (2009) SCL and associated proteins distinguish active from repressive GATA transcription factor complexes. *Blood* 113:2191–2201.
10. Goecks J, Nekrutenko A, Taylor J (2010) Galaxy: A comprehensive approach for supporting accessible, reproducible, and transparent computational research in the life sciences. *Genome Biol* 11:R86.
11. Cheng Y, et al. (2009) Erythroid GATA1 function revealed by genome-wide analysis of transcription factor occupancy, histone modifications, and mRNA expression. *Genome Res* 19:2172–2184.

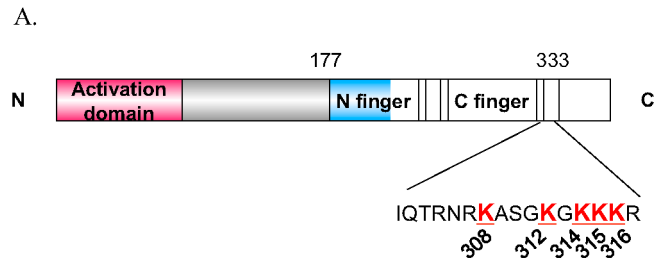

B. Trypsin Digestion

| Acetylated C-motif peptides | Acetylated residues     |
|-----------------------------|-------------------------|
| RKASGK@GK@K@KR              | 312, 314, 315           |
| RK@ASGK@GKKK                | 308, 312                |
| RK@ASGK@GK@KKR              | 308, 312, 314           |
| RK@ASGK@GK@KK               | 308, 312, 314           |
| RK@ASGK@GKK                 | 308, 312                |
| RK@ASGK@GK@K@K@RG           | 308, 312, 214, 315, 316 |
| RK@ASGK@GK@K@KR             | 310, 312, 314, 315      |
| KASGK@GK@K@KR               | 312, 314, 315           |
| KASGK@GK@KK                 | 312, 314                |

**Fig. S1.** Mass spectrometry (MS) of the zinc finger region of GATA1 acetylated by CBP in vitro. The zinc finger domain of GATA1 fused to GST [GST-f(GATA1)] was acetylated in vitro by purified recombinant acetyltransferase domain of CBP. MS analysis of trypsin digested products produced the listed acetylated GATA1 peptides. Acetylated lysine residues within the cluster are highlighted in red. Di-, tri-, tetra-, and penta-acetyl peptides are identified.

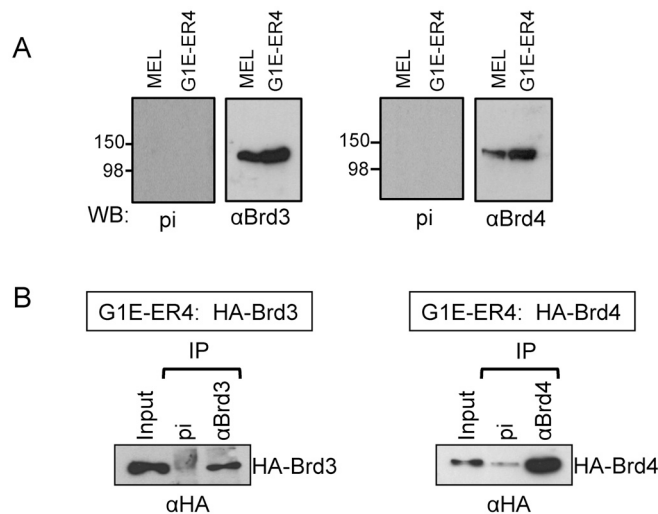

**Fig. S2.** Characterization of Brd3 and Brd4 antibodies. (A) Western blots of nuclear extracts from G1E-ER4 and MEL cells with Brd3 and Brd4 antibodies or preimmune (pi) sera. (B) Nuclear extracts from HA-Brd3 or HA-Brd4 expressing G1E-ER4 cells were immunoprecipitated with anti-Brd3, anti-Brd4, or preimmune sera. Bound material was analyzed by Western blot using HA antibodies.

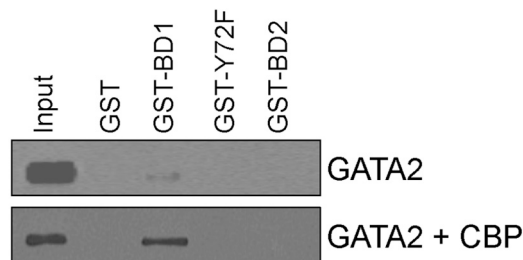

**Fig. S3.** GATA2 associates with BD1 in a CBP-dependent manner. GST-BD1, -BD2, and -Y72F were immobilized on glutathione sepharose and exposed to nuclear extracts from 293T cells transiently transfected with GATA2 alone or with CBP. Bound proteins were analyzed by Western blot with antibodies against GATA2. Input equals 2.5%.



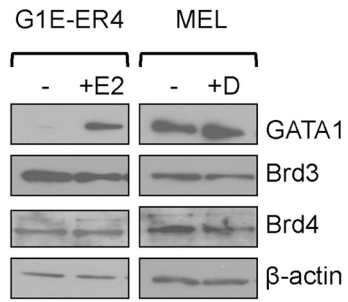

**Fig. S5.** Brd3 and Brd4 protein levels are unchanged following erythroid maturation. Anti-Brd3, -Brd4, and -GATA1 Western blots of nuclear extracts from G1E-ER4 and MEL cells before and after estradiol (+E2) and DMSO (+D) treatment, respectively. β-actin served as loading control.



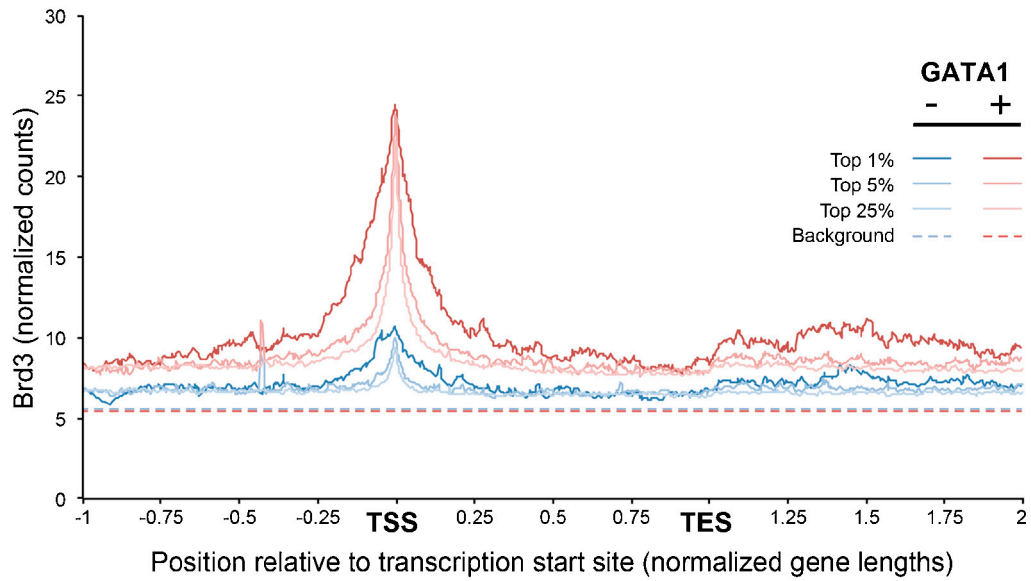

**Fig. S7.** Composite profiles of mean normalized Brd3 binding signals of top 1%, 5%, or 25% transcribed genes in cells with or without active GATA1. The plots extend one full gene length 5' and 3' of the transcribed regions. TSS, transcription start site; TES, transcription end site; Background, mean Brd3 signal genome-wide.
